# Supplementary material for: Honey Extracts Exhibit Cytoprotective Properties against UVB-Induced Photodamage in Human Experimental Skin Models
Source: PubMed Central journal article supplement (PMC7402120; doi:10.3390/antiox9070566), 2020-06-30
Supplement: antioxidants-09-00566-s001.pdf [file antioxidants-09-00566-s001.pdf]

*Absorbance measurement of honey extracts ME16.1 and ME20.3*

In brief, honey extracts were diluted in dH<sub>2</sub>O to final concentrations 20, 2, and 0.2 µg/ml (Table S1, S2). Absorption spectrum (190 – 800 nm) of the honey samples was assessed by scanning the absorbance of the solutions in a spectrophotometer (Libra S22, Biochrom Ltd, Cambridge, UK). The absorption spectrum of the honey extracts ME16.1 and ME20.3 at concentration 20 µg/ml (working concentration in the study) is illustrated in Figure S1.

**Table S1.** Absorption spectrum of ME16.1 sample in different concentrations (µg/ml)

| Wavelength (nm) | ME16.1     |            |            |
|-----------------|------------|------------|------------|
|                 | 20µg/ml    | 2µg/ml     | 0.2µg/ml   |
|                 | Absorbance | Absorbance | Absorbance |
| 190             | 2.591      | 2.283      | 2.332      |
| 200             | 2.954      | 2.602      | 2.653      |
| 210             | >+3        | 2.758      | 2.82       |
| 220             | 2.99       | 2.58       | 2.694      |
| 230             | 1.006      | 0.342      | 0.453      |
| 240             | 0.586      | 0.073      | 0.126      |
| 250             | 0.469      | 0.053      | 0.102      |
| 260             | 0.457      | 0.051      | 0.093      |
| 270             | 0.511      | 0.055      | 0.092      |
| 280             | 0.576      | 0.061      | 0.089      |
| 290             | 0.637      | 0.066      | 0.086      |
| 300             | 0.608      | 0.063      | 0.08       |
| 310             | 0.55       | 0.056      | 0.074      |
| 320             | 0.506      | 0.051      | 0.069      |
| 330             | 0.461      | 0.048      | 0.067      |
| 340             | 0.401      | 0.041      | 0.063      |
| 350             | 0.334      | 0.034      | 0.06       |
| 360             | 0.276      | 0.028      | 0.057      |
| 370             | 0.228      | 0.024      | 0.054      |
| 380             | 0.189      | 0.021      | 0.052      |
| 390             | 0.153      | 0.017      | 0.05       |
| 400             | 0.126      | 0.015      | 0.048      |
| 410             | 0.106      | 0.013      | 0.047      |
| 420             | 0.093      | 0.012      | 0.045      |
| 430             | 0.085      | 0.012      | 0.045      |
| 440             | 0.079      | 0.012      | 0.044      |
| 450             | 0.075      | 0.011      | 0.043      |
| 460             | 0.071      | 0.011      | 0.042      |
| 470             | 0.069      | 0.011      | 0.041      |
| 480             | 0.067      | 0.011      | 0.041      |
| 490             | 0.064      | 0.011      | 0.04       |
| 500             | 0.062      | 0.011      | 0.039      |
| 510             | 0.06       | 0.01       | 0.038      |
| 520             | 0.059      | 0.01       | 0.038      |
| 530             | 0.058      | 0.01       | 0.037      |

|     |       |       |       |
|-----|-------|-------|-------|
| 540 | 0.056 | 0.01  | 0.036 |
| 550 | 0.055 | 0.01  | 0.036 |
| 560 | 0.054 | 0.01  | 0.035 |
| 570 | 0.053 | 0.01  | 0.035 |
| 580 | 0.052 | 0.01  | 0.034 |
| 590 | 0.051 | 0.01  | 0.034 |
| 600 | 0.05  | 0.01  | 0.033 |
| 610 | 0.049 | 0.01  | 0.032 |
| 620 | 0.048 | 0.01  | 0.031 |
| 630 | 0.047 | 0.01  | 0.031 |
| 640 | 0.046 | 0.01  | 0.031 |
| 650 | 0.046 | 0.01  | 0.031 |
| 660 | 0.045 | 0.01  | 0.031 |
| 670 | 0.044 | 0.009 | 0.031 |
| 680 | 0.043 | 0.009 | 0.031 |
| 690 | 0.043 | 0.009 | 0.031 |
| 700 | 0.042 | 0.009 | 0.031 |
| 710 | 0.042 | 0.009 | 0.029 |
| 720 | 0.041 | 0.009 | 0.028 |
| 730 | 0.04  | 0.009 | 0.028 |
| 740 | 0.039 | 0.009 | 0.027 |
| 750 | 0.039 | 0.009 | 0.027 |
| 760 | 0.038 | 0.009 | 0.027 |
| 770 | 0.038 | 0.009 | 0.027 |
| 780 | 0.037 | 0.009 | 0.027 |
| 790 | 0.037 | 0.009 | 0.027 |
| 800 | 0.036 | 0.009 | 0.027 |

**Table S2.** Absorption spectrum of ME20.3 sample in different concentrations ( $\mu\text{g/ml}$ )

| Wavelength (nm) | ME20.3              |                    |                      |
|-----------------|---------------------|--------------------|----------------------|
|                 | 20 $\mu\text{g/ml}$ | 2 $\mu\text{g/ml}$ | 0.2 $\mu\text{g/ml}$ |
|                 | Absorbance          | Absorbance         | Absorbance           |
| 190             | 2.643               | 2.359              | 2.306                |
| 200             | >+3                 | 2.69               | 2.634                |
| 210             | >+3                 | 2.854              | 2.782                |
| 220             | >+3                 | 2.556              | 2.229                |
| 230             | 2.173               | 0.48               | 0.321                |
| 240             | 0.946               | 0.217              | 0.121                |
| 250             | 0.842               | 0.194              | 0.102                |
| 260             | 0.792               | 0.176              | 0.093                |
| 270             | 0.719               | 0.159              | 0.09                 |
| 280             | 0.658               | 0.148              | 0.087                |
| 290             | 0.563               | 0.128              | 0.08                 |
| 300             | 0.433               | 0.1                | 0.074                |
| 310             | 0.315               | 0.077              | 0.067                |
| 320             | 0.243               | 0.062              | 0.064                |
| 330             | 0.193               | 0.052              | 0.06                 |
| 340             | 0.144               | 0.042              | 0.057                |

|     |       |       |       |
|-----|-------|-------|-------|
| 350 | 0.109 | 0.035 | 0.054 |
| 360 | 0.083 | 0.03  | 0.052 |
| 370 | 0.066 | 0.026 | 0.051 |
| 380 | 0.052 | 0.024 | 0.049 |
| 390 | 0.04  | 0.021 | 0.048 |
| 400 | 0.031 | 0.019 | 0.047 |
| 410 | 0.024 | 0.017 | 0.047 |
| 420 | 0.02  | 0.016 | 0.046 |
| 430 | 0.018 | 0.015 | 0.045 |
| 440 | 0.015 | 0.014 | 0.044 |
| 450 | 0.013 | 0.013 | 0.044 |
| 460 | 0.011 | 0.013 | 0.043 |
| 470 | 0.01  | 0.013 | 0.042 |
| 480 | 0.008 | 0.012 | 0.042 |
| 490 | 0.006 | 0.01  | 0.04  |
| 500 | 0.006 | 0.01  | 0.04  |
| 510 | 0.005 | 0.1   | 0.039 |
| 520 | 0.005 | 0.009 | 0.037 |
| 530 | 0.004 | 0.009 | 0.037 |
| 540 | 0.004 | 0.009 | 0.036 |
| 550 | 0.004 | 0.009 | 0.036 |
| 560 | 0.004 | 0.009 | 0.036 |
| 570 | 0.004 | 0.009 | 0.036 |
| 580 | 0.004 | 0.009 | 0.036 |
| 590 | 0.004 | 0.009 | 0.036 |
| 600 | 0.003 | 0.009 | 0.036 |
| 610 | 0.003 | 0.009 | 0.036 |
| 620 | 0.003 | 0.009 | 0.035 |
| 630 | 0.003 | 0.008 | 0.034 |
| 640 | 0.003 | 0.008 | 0.034 |
| 650 | 0.003 | 0.008 | 0.033 |
| 660 | 0.002 | 0.008 | 0.033 |
| 670 | 0.002 | 0.008 | 0.033 |
| 680 | 0.002 | 0.008 | 0.033 |
| 690 | 0.002 | 0.008 | 0.032 |
| 700 | 0.002 | 0.008 | 0.032 |
| 710 | 0.002 | 0.008 | 0.032 |
| 720 | 0.002 | 0.008 | 0.032 |
| 730 | 0.002 | 0.007 | 0.032 |
| 740 | 0.002 | 0.007 | 0.032 |
| 750 | 0.002 | 0.007 | 0.032 |
| 760 | 0.002 | 0.007 | 0.031 |
| 770 | 0.002 | 0.007 | 0.03  |
| 780 | 0.002 | 0.007 | 0.029 |
| 790 | 0.002 | 0.006 | 0.029 |
| 800 | 0.002 | 0.006 | 0.029 |

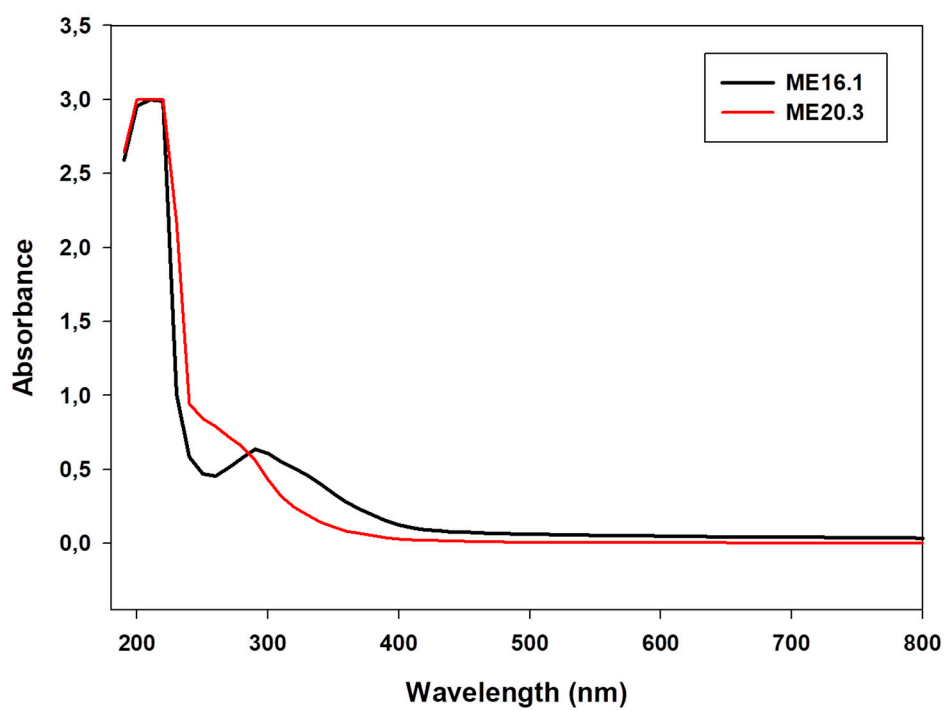

Figure S1. Absorption spectrum (190 – 800 nm) of honey extracts (ME16.1 and ME20.3) at 20µg/ml.
